# Supplementary material
Source: publisher figshare collection journal article supplement (https://gsapubs.figshare.com/ndownloader/files/22410012)
Supplement: Supplementary file 1 [file 22410012]

## Sheet: Sheet1
FST height (m)	wt % TOC
396	2.75
399	2.95
400	2.31
401	2.04
403	2.47
406	2.28
407	1.97
409	1.16
410	1.37
411	2.04
413	1.24
414.5	1.53
415	0.96
416	0.9
418	1.38
419	0.6
420	0.67
421	1.75
422	1.71
423	5.13
424	1.65
425	1.78
427	1.02
428	1.13
430	0.33
431	0.63
434	3.38
437	1.28
438	1.84
439	2.13
440	1.43
441	1.38
442	1.58
443	1.91
444	3.09
445	1.64
446	2.09
447	1.55
449	2.07
450	2.34
452	2.99
460	2.79
465	2.21
466	2.29
467	2.89
468	1.18
472.2	2.96
474	4.17
482.7	2.39
489	3.16
493	3.9
501.1	3.26
507	3.3
518.8	4.38
520	2.5
537	1.64
541	1.1
549.5	0.31
565	4.74
570.8	3.06
574.4	2.7
581	2.51
585.7	4.19
587.5	1
590	1.23
591.5	1.18
597	1.73
598	2.73
609.3	1.55
610	3.01
618.5	2.37
623	2.45
624	3.6
633	3.14
635	3.32
637	1.82
639	2.09
641	0.91
648	2.8
651	3.06
654	1.02
658	1.66
660	1.1
666	2.48
669	2.75
671	1.24
672	1.76
673	3.02
674	2.15
675	3.09
677	1.48
679	2.18
680	1.15
682	2.04
687	1.46
690	1.62
690	2.69
694	2.24
697	1.93
700	1.5
701	1.05
703	1.7
705	2.3
706	0.24
